# Supplementary material for: Synthesis and characterization of a family of tetranuclear manganese(iii) phosphonate complexes
Source: Royal Society of Chemistry journal article supplement (doi:10.1039/b706514k), 2007-01-01
Supplement: b706514k.pdf [file b706514k.pdf]

## Synthesis and characterization of a family of tetranuclear manganese(III) phosphonate complexes

Mei Wang, Chengbing Ma, Daqiang Yuan, Mingqiang Hu, Changneng Chen and  
Qiutian Liu

### Table of Contents:

Fig. S1 The packing diagram of compound **2** showing the hydrogen-bonded network.

Fig. S2 Differential pulse voltammetry ( $20 \text{ mV s}^{-1}$ ) for complex **1** in distilled MeCN. The quoted potentials (V) are *vs.* Ag/AgCl.

Fig. S3 ESI-MS spectrum of the acetonitrile solution of **1**.

Fig. S4 Cyclic voltammogram ( $100 \text{ mV s}^{-1}$ ) for complex **3** in distilled MeCN. The inset is the curve of the scan rate dependence in the range  $50\text{-}500 \text{ mV s}^{-1}$ . The quoted potentials (V) are *vs.* Ag/AgCl.

Fig. S5 Differential pulse voltammetry ( $20 \text{ mV s}^{-1}$ ) for complex **3** in distilled MeCN. The quoted potentials (V) are *vs.* Ag/AgCl.

Fig. S6 TG curves of compounds **1** and **3**.

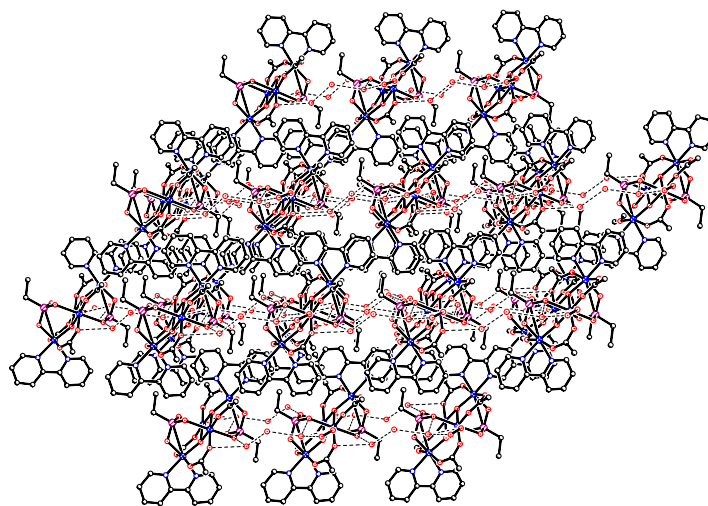

**Fig. S1** The packing diagram of compound **2** showing the hydrogen-bonded network.

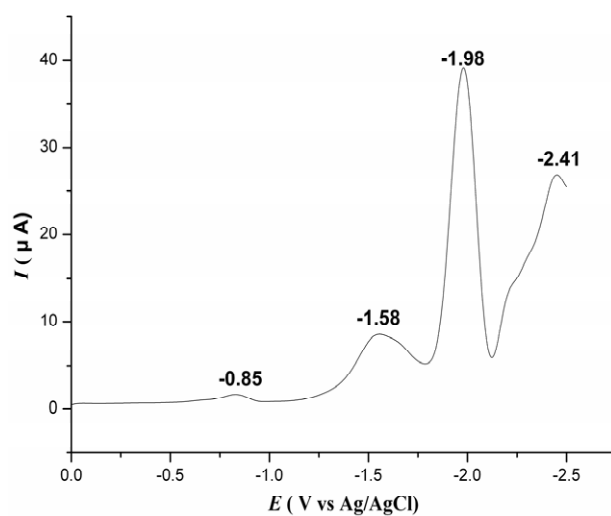

**Fig. S2** Differential pulse voltammety ( $20 \text{ mV s}^{-1}$ ) for complex **1** in distilled MeCN. The quoted potentials (V) are vs. Ag/AgCl.

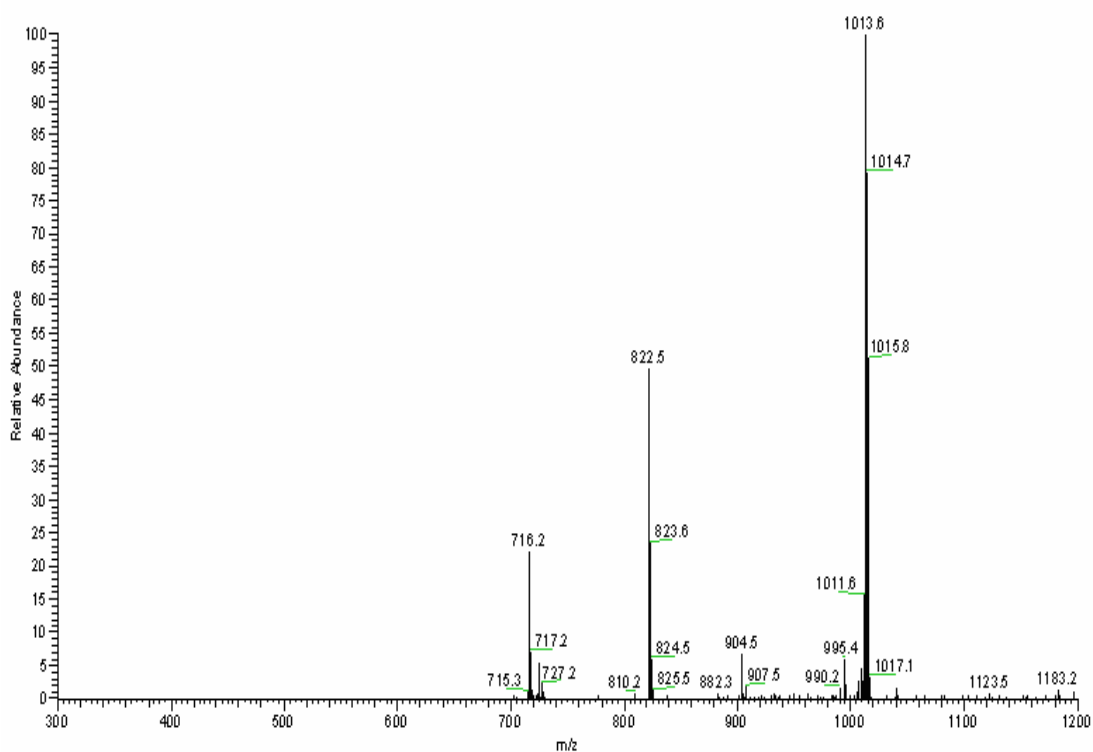

**Fig. S3** ESI-MS spectrum of the acetonitrile solution of **1**.

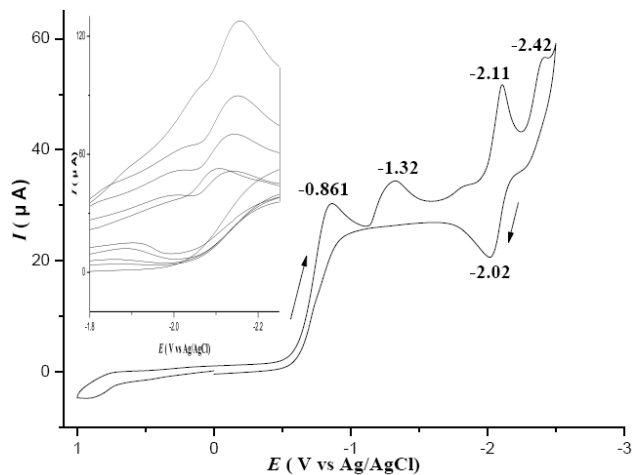

**Fig. S4** Cyclic voltammogram ( $100 \text{ mV s}^{-1}$ ) for complex **3** in distilled MeCN. The inset is the curve of the scan rate dependence in the range  $50\text{-}500 \text{ mV s}^{-1}$ . The quoted potentials (V) are vs. Ag/AgCl.

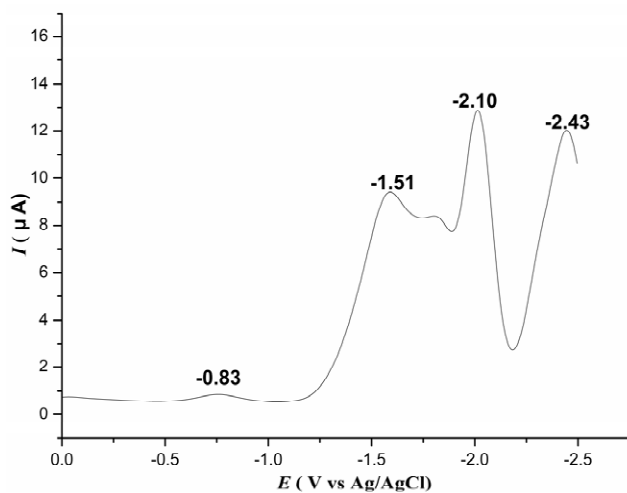

**Fig. S5** Differential pulse voltammetry ( $20 \text{ mV s}^{-1}$ ) for complex **3** in distilled MeCN. The quoted potentials (V) are vs. Ag/AgCl.

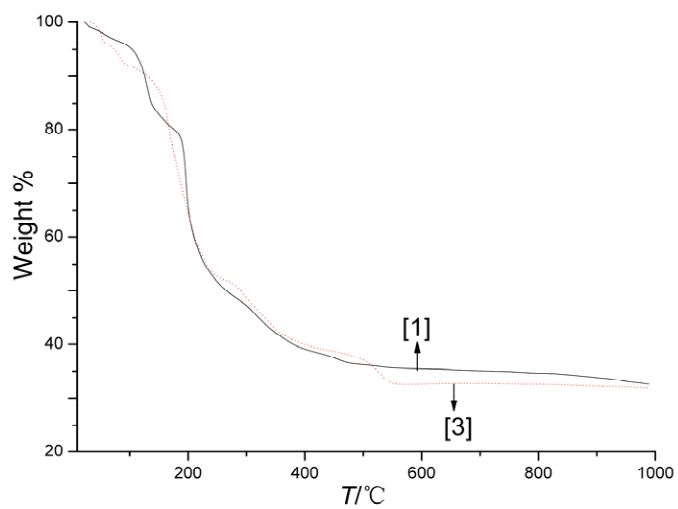

**Fig. S6** TG curves of compounds **1** and **3**.
